# Supplementary material for: Characterization of Cistus × incanus L. and Cistus ladanifer L. Extracts as Potential Multifunctional Antioxidant Ingredients for Skin Protecting Cosmetics
Source: PubMed Central journal article supplement (PMC7139296; doi:10.3390/antiox9030202), 2020-03-01
Supplement: antioxidants-09-00202-s001.pdf [file antioxidants-09-00202-s001.pdf]

Supplementary Materials:

**Table S1.** Correlation between the content of phytochemical compound and biological activity of *Cistus* extracts.

|                                | <i>ellagic acid</i> | <i>gallic acid</i> | <i>quercetrine</i> | <i>kaempferol glucoside</i> | <i>epigallocatechin</i> | <i>galocatechin</i> | <i>epicatechin</i> | <i>rutoside</i> | <i>epigallocatechin dimer</i> | <i>kaempferol diglycoside</i> | <i>kaempferol diglycoside</i> | <i>myricetin</i> | <i>myricetin pentoside</i> | <i>myricitrin</i> | <i>quercetin pentoside</i> |
|--------------------------------|---------------------|--------------------|--------------------|-----------------------------|-------------------------|---------------------|--------------------|-----------------|-------------------------------|-------------------------------|-------------------------------|------------------|----------------------------|-------------------|----------------------------|
| Antioxidant activity           | -.174               | .182               | .575               | .432                        | .902**                  | -.199               | .845**             | .218            | -.120                         | .321                          | .297                          | .271             | .456                       | .575              | .599                       |
| Tyrosinase inhibitory activity | .245                | .232               | -.490              | -.064                       | -.941***                | -.127               | -.955***           | -.065           | -.256                         | .207                          | .333                          | .0660            | -.365                      | -.878**           | -.495                      |
| Cytotoxicity against A375      | -.130               | .513               | .460               | .533                        | .253                    | .478                | .204               | .469            | -.244                         | .564                          | .329                          | .512             | .395                       | .252              | .429                       |

\*\*  $p < 0.01$ , \*\*\*  $p < 0.001$ .

**Table S2.** Correlation between tyrosinase inhibitory activity and antioxidant activity of *Cistus* extracts and cytotoxicity against A375 melanoma cells.

|                                | <i>C. incanus</i><br>60% M | <i>C. ladanifer</i><br>60% M | <i>C. incanus</i><br>60% SOX | <i>C. ladanifer</i><br>60% SOX | <i>C. incanus</i><br>100% M | <i>C. ladanifer</i><br>100% M | <i>C. incanus</i><br>100% SOX | <i>C. ladanifer</i><br>100% SOX |       |
|--------------------------------|----------------------------|------------------------------|------------------------------|--------------------------------|-----------------------------|-------------------------------|-------------------------------|---------------------------------|-------|
| Cytotoxicity against A375      |                            |                              |                              |                                |                             |                               |                               |                                 |       |
| Antioxidant activity           |                            | -.730                        | -.762                        | -.396                          | -.519                       | -.280                         | -.184                         | -.209                           | -.547 |
| Tyrosinase inhibitory activity |                            | .955*                        | .972**                       | .976**                         | .893*                       | .957*                         | .489                          | .962**                          | .723  |
| Antioxidant activity           |                            |                              |                              |                                |                             |                               |                               |                                 |       |
| Tyrosinase inhibitory activity |                            | -.807                        | -.637                        | -.609                          | -.699                       | -.538                         | -.591                         | -.354                           | -.578 |

\*  $p < 0.05$ , \*\*  $p < 0.01$ .

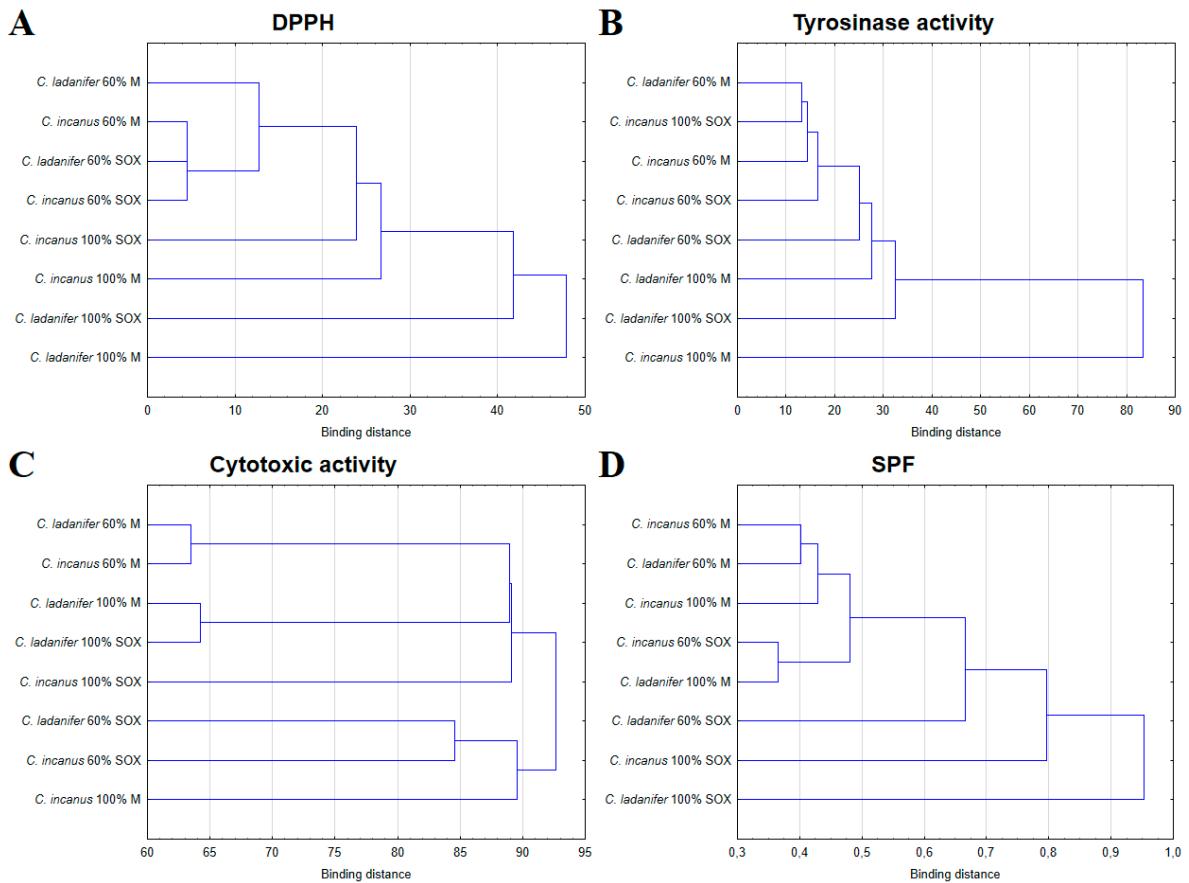

**Figure S1.** Dendrograms showing similarities between the tested extracts depending on DPPH (A), tyrosinase activity (B), cytotoxic activity (C) and SPF results (D).

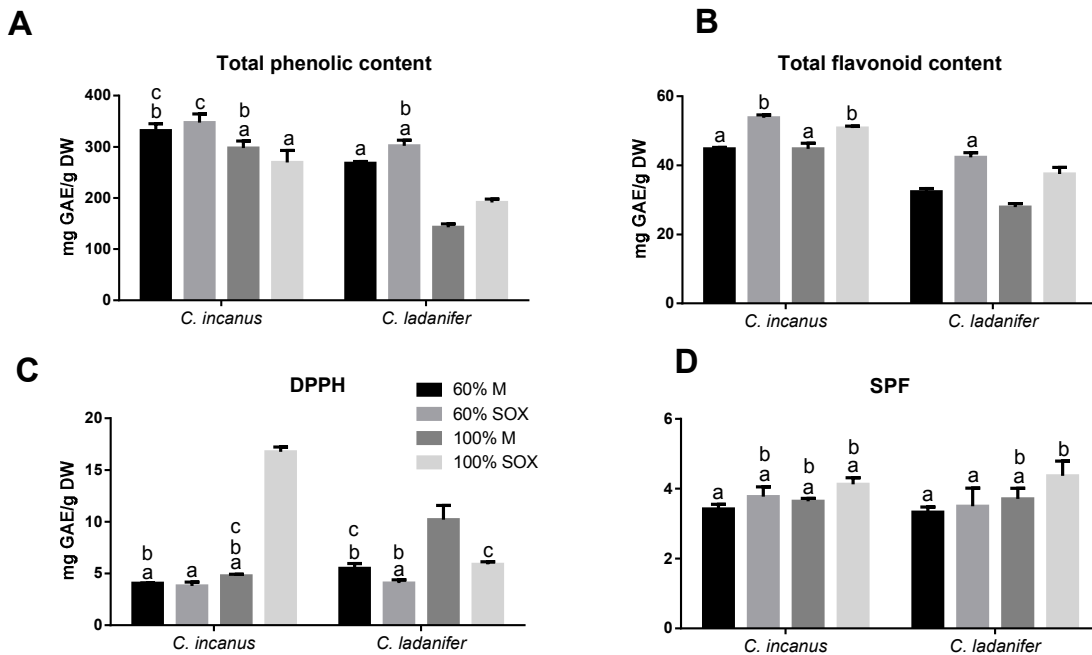

**Figure S2.** Graphs showing the content of total phenolics, flavonoids, DPPH scavenging activity in *C. incanus* and *C. ladanifer* extracts and determination of the Sun Protection Factor (SPF) of *C. incanus* and *C. ladanifer* extracts; each value represents mean  $\pm$  SD ( $n = 3$ ). Means not sharing the same letter are significantly different at  $p < 0.05$ .
